# Supplementary material for: Development and validation of a nomogram to predict coronary heart disease in patients with rheumatoid arthritis in northern China
Source: publisher site journal article supplement (doi:10.18632/aging.102823), 2020-02-29
Supplement: Supplementary file [file aging-v12i4-102823-supplementary-material-SD2.pdf]

## SUPPLEMENTARY TABLES

**Supplementary Table 1. Model evaluation of six machine learning models.**

|                      | Training group |          |      |        |           |      | Validation group |          |      |        |           |      |
|----------------------|----------------|----------|------|--------|-----------|------|------------------|----------|------|--------|-----------|------|
|                      | auc            | accuracy | f1   | recall | precision | ber  | auc              | accuracy | f1   | recall | precision | ber  |
| <b>Simple model</b>  |                |          |      |        |           |      |                  |          |      |        |           |      |
| GBDT                 | 0.80           | 0.76     | 0.60 | 0.61   | 0.65      | 0.39 | 0.74             | 0.76     | 0.56 | 0.58   | 0.58      | 0.42 |
| KNN                  | 0.92           | 0.91     | 0.86 | 0.86   | 0.90      | 0.14 | 0.74             | 0.76     | 0.56 | 0.56   | 0.68      | 0.44 |
| LR                   | 0.79           | 0.71     | 0.68 | 0.70   | 0.68      | 0.30 | 0.76             | 0.69     | 0.65 | 0.69   | 0.65      | 0.31 |
| RF                   | 0.91           | 0.81     | 0.73 | 0.72   | 0.83      | 0.28 | 0.75             | 0.76     | 0.63 | 0.63   | 0.72      | 0.37 |
| XGB                  | 0.81           | 0.77     | 0.67 | 0.66   | 0.74      | 0.34 | 0.74             | 0.77     | 0.65 | 0.63   | 0.70      | 0.37 |
| SVM                  | 0.78           | 0.72     | 0.69 | 0.71   | 0.68      | 0.29 | 0.75             | 0.69     | 0.65 | 0.70   | 0.65      | 0.30 |
| <b>Complex model</b> |                |          |      |        |           |      |                  |          |      |        |           |      |
| GBDT                 | 0.97           | 0.91     | 0.90 | 0.91   | 0.89      | 0.09 | 0.77             | 0.73     | 0.65 | 0.67   | 0.66      | 0.33 |
| KNN                  | 1.00           | 1.00     | 1.00 | 1.00   | 1.00      | 0.00 | 0.78             | 0.75     | 0.53 | 0.54   | 0.66      | 0.46 |
| LR                   | 0.79           | 0.76     | 0.69 | 0.69   | 0.72      | 0.31 | 0.79             | 0.76     | 0.68 | 0.68   | 0.70      | 0.32 |
| RF                   | 0.96           | 0.89     | 0.87 | 0.88   | 0.86      | 0.12 | 0.76             | 0.73     | 0.65 | 0.66   | 0.65      | 0.34 |
| XGB                  | 0.92           | 0.86     | 0.82 | 0.80   | 0.86      | 0.20 | 0.76             | 0.75     | 0.63 | 0.62   | 0.65      | 0.38 |
| SVM                  | 0.81           | 0.75     | 0.72 | 0.74   | 0.71      | 0.26 | 0.79             | 0.72     | 0.68 | 0.72   | 0.67      | 0.28 |

Abbreviation: GBDT:gradient boosting decision tree; KNN: k-nearest-neighbors; LR: logistic regression; RF: random forest; XGB: xgradient-boosting; SVM: support vector machine.

**Supplementary Table 2. Risk factors for RA patients developing to CHD in the training group.**

|                      | Simple model    |       | Complex model (adjusted age and sex) |       |
|----------------------|-----------------|-------|--------------------------------------|-------|
|                      | OR(95% CI)      | P     | OR(95% CI)                           | P     |
| Age (year)           | -               | -     | 1.05(1.04,1.07)                      | 0.000 |
| Sex (male, %)        | -               | -     | 0.88(0.6,1.28)                       | 0.503 |
| Hypertension(%)      | 3.06(2.26,4.15) | 0.000 | 2.95(2.15,4.05)                      | 0.000 |
| Anti-CCP-positive(%) | 1.32(0.95,1.82) | 0.096 | 1.41(1.00,1.97)                      | 0.047 |
| RF-positive(%)       | 1.48(1.04,2.11) | 0.031 | 1.36(0.94,1.97)                      | 0.099 |
| ESR(mm/h)            | 1.01(1.00,1.01) | 0.001 | 1.01(1.00,1.01)                      | 0.009 |
| CRP(mg/L)            | 1(0.99,1.00)    | 0.958 | 1.00(1.18,1.80)                      | 0.880 |
| LDL(mmol/L)          | 1.85(1.25,2.72) | 0.002 | 1.95(1.31,2.91)                      | 0.001 |
| TC(mmol/L)           | 0.79(0.54,1.14) | 0.209 | 0.77(0.53,1.12)                      | 0.166 |
| HDL(mmol/L)          | 2.17(1.26,3.76) | 0.006 | 2.04(1.16,3.61)                      | 0.013 |
| TG(mmol/L)           | 1.41(1.14,1.74) | 0.002 | 1.47(1.19,1.81)                      | 0.000 |
| Constant             | 0.017           | 0.000 | 0.001                                | 0.000 |

Abbreviation: LDL, low-density lipoprotein cholesterol; TC, total cholesterol; TG, triglycerides; HDL, high-density lipoprotein cholesterol; RF-positive, positive rheumatoid factor; CRP, C-reactive protein; Anti-CCP-positive, positive anti-cyclic citrullinated peptide antibody; ESR, erythrocyte sedimentation rate.

**Supplementary Table 3. Sensitivity and specificity of FRS and the prediction model in detecting CHD.**

| <b>Variables</b> | <b>AUC</b> | <b><i>P</i></b> | <b>95%CI</b> | <b>Cut-off %</b>  | <b>Specificity</b> | <b>Sensitivity</b> |
|------------------|------------|-----------------|--------------|-------------------|--------------------|--------------------|
| FRS              | 0.66       | 0.000           | 0.62-0.70    | 3.5% <sup>a</sup> | 52.4%              | 71.8%              |
| PRE1             | 0.73       | 0.000           | 0.69-0.76    | 23.7%             | 59.2%              | 73.8%              |
| PRE2             | 0.77       | 0.000           | 0.74-0.80    | 32.8%             | 77.2%              | 63.9%              |

AUC, area under the curve; CI, confidence interval; <sup>a</sup> 10-year cardiovascular disease risk
